# Supplementary material for: Quantification of uncertainty in rapid estimation of earthquake fatalities based on scenario analysis
Source: Copernicus journal article supplement (doi:10.5194/nhess-2018-187), 2018-08-01
Supplement: Supplementary file [file nhess-2018-187-RC1-supplement.pdf]

Review of  
**Quantification of uncertainty in rapid estimation 1 of earthquake fatalities based on scenario analysis**  
By Xiaoxue Zhang et al.

Submitted to Natural Hazards and Earth System Sciences (NHESS).  
for a Special Issue  
*Advances in computational modelling of natural hazards and geohazards*

### General comments

Clearly, the quantification of uncertainty when rapidly estimating earthquake fatalities is an important goal. There are many important uses and users of rapid earthquake losses assessments. Hence, the topic is of importance and is timely given improved data and computational resources to bring to bear for such calculations. Unfortunately, this study does not further the science of human casualty estimation, nor does it put forth useful modeling tools to address this challenge. The authors inadequately describe the limitations of their own model and those of earlier studies that rely on inadequate relationships (predictor variables) for estimating fatalities. They further ignore significant progress that has been made more recently. In short, the authors rely on shaking computed based on functions of magnitude, time of day, and epicentral intensity rather than employing modern ground motion prediction strategies.

This manuscript is not ready for publication in its current form due to both considerable grammatical issues and scientific limitations. Many sentences require grammatical improvements and many more are at best noninformative due to language, or more general communication issues. Hence, any resubmission needs to go through significant editorial efforts. Yet, as clarified below, the real limitations of this study are with the proposed model, or at least my limited understanding of the model given the descriptions as presented. Below I enumerate some of my concerns.

### Specific comments

1. The Abstract does not provide any useful information about the study nor the model presented. I do not consider this manuscript ready for peer review:

Abstract:

9 The rapid estimation of earthquake fatalities using earthquake parameters is the core  
10 basis for emergency response. However, there are numerous factors affecting earthquake  
11 fatalities, and it is impossible to obtain an accurate estimation result. The key to solve this  
12 problem is quantifying the uncertainty. In this paper, we proposed a new method to estimate  
13 earthquake fatalities and quantify the uncertainty based on basic earthquake emergency scenarios.  
14 The accuracy of the model is verified by earthquake that occurred during recent year. The  
15 preliminary analysis and comparison results show that the model is more effective and reasonable  
16 and can also provide a theoretical basis for post-earthquake emergency response.

2. An early, key description of the methodology is particularly opaque to the reader:

L69. “*The basic scenarios are constructed using the magnitude, the initial time and the relationship between the epicentral intensity and the epicentral fortification intensity, and these scenarios consider combinations of parameters.*” *Epicentral intensity*\* is an archaic concept, and *fortification intensity* is not defined, nor referenced, and the terminology is unknown to this reviewer (who has been studying earthquake macroseismic intensity for 25 years). Either that term is used in China but not elsewhere and is not explained, or it is a misuse of key terminology (but I cannot tell). “*consider a combination of parameters*” does not inform the reader at all. Even the term “*initial time*” is not explained.

\**epicentral intensity*, normally referred to as  $I_0$ , e.g., the intensity at the epicenter, does not reflect any of the modern understanding of site amplification, distance to fault, and the fact that the epicenter---particularly for larger earthquakes considered---in this study, does not necessarily represent the worst shaking levels experienced. Standard operating procedures worldwide use ShakeMap (USGS) or equivalent strategies, or at least employ modern ground motion

prediction equations (GMPEs) with some knowledge of site conditions. None of these modern tools are mentioned in this paper not are these basis seismological considerations described or addressed.

3. Or, also early in the manuscript: L92. *A basic scenario combination can better express the relationship between the parameters and earthquake fatalities. Then, information diffusion theory was used to diffuse the sample data based on the basic scenarios considering the temporarily nonmeasurable factors and the extreme event under each scenario.* This reveals very little to this reviewer. It is difficult to sense of either sentence. Please rewrite.
4. Later on, L155: *However, when dividing the samples into each scenario, the sample size will be small, and it is difficult to obtain the relation equation using traditional mathematical statistics. Therefore, the indirect approach of this study consisted of information diffusion theory to obtain the mortality rate.* If traditional statistics can't be used, isn't the problem is ill-posed? Explain why diffusion theory would change this?
5. L30. *At present, the methods for estimating earthquake fatalities mainly include analytical, semi-analytical and empirical models (Federal Emergency Management 30 Agency (FEMA), 2005).* → Quoting an outdated 2005 article for "present" methods does not seem appropriate.
6. L47. *Jaiswal et al. (2009) established a mortality model based on population distribution according to rebuilt earthquake case scenes and studied regional earthquake cases (Jaiswal et al. 2010).* In addition to grammatical problems, this does not adequately explain those Jaiswal et al studies.
7. L50. *Generally speaking, the current empirical model for fatality estimation is derived from available historical data and relies on parameter regression analysis.* This implies that the prior reference to Jaiswal et al (2009, 2010) are parametric regression studies (as *are* the *earlier* studies cited). That is incorrect. Jaiswal's studies are significantly more advanced in terms of hazard input (ShakeMap) and empirical model building than those proposed in the current manuscript, at least from what I can glean from the descriptions herein.
8. L52. *First, it will ignore extreme events when there is lack of historical data. Second, most models consider fewer factors and do not consider the influence between know factors and possible unknown factors.*
9. L58. *During recent years, the study of uncertainty in the estimation of earthquake fatalities has mainly regarded the qualitative.* These statements are incorrect. Two of the references cited (Jaiswal et al 2009, 2010), among others (Wald et al. 2010), specifically address uncertainty in fatalities estimates. Extreme events are fine as long as the model is calibration. For areas without data (lack of damaging earthquakes), of course empirical models are inadequate. This point was not articulated.
10. L62. *There are many linguistic uncertainties when describing the uncertainty in terms of vagueness and context, which can result in an inaccurate qualitative description.* Wald et al (2010) specifically address these issues. This manuscript under review does not address any of them directly.
11. L63. *The numerical quantification of uncertainty is possible for emergency decision making when the information is partial or not quantifiable during the process of estimation.* I don't understand this sentence.
12. L71 *This study not only breaks the traditional empirical model form but also quantifies the uncertainty in the estimation results.* Actually, the form of model used (again, as I try to interpret it) *is* traditional and is no longer used, and uncertainty of fatalities estimates *has* been done in the past (see #9 above). Despite the claim that this has not been done before, it has. Yet, nowhere is the current study *is* uncertainty actually quantified or well described. The only quantification of the model is an "accuracy rate" based on hindcasting a subset of the events for one sampled subset.
13. L78. *number of victims.* "Victims" is not defined. Is it injured (to what degree), displaced persons?
14. L79. *The disaster information was derived from EM-DAT (<http://www.emdat.be/>), and the earthquake parameters were obtained from PAGER (<https://www.pager.com/>).* What is meant by *disaster information*''? Which *earthquake parameters* where obtained from PAGER? PAGER does not provide epicentral intensity, so where did that come from? PAGER is NOT [www.pager.com](http://www.pager.com).
15. L86. *"Scholars have discussed the factors that affect earthquake fatalities, which include magnitude, intensity, initial time, population exposure, housing fragility, and individual factors (Oike, 1991; Nichols, 2003)".* These are antiquated references given the rapid evolution of this science.
16. L91. *"Basic earthquake emergency scenarios were constructed based on a combination of the main factors."* Please rewrite; I can't understand.
17. L218. *We collected data on destructive earthquakes that caused casualties in China from 1970 to 2017.* Wasn't it stated on L.79 that these data were collected by USGS (PAGER)? Or if you did collect such data, what where the sources?
18. L97. *Via qualitative analysis using the collected data, the main factors affecting earthquake fatalities were acquired. There is an approximately linear relationship between the magnitude and the number of fatalities (Figure 2). As the*

*magnitude increases, the number of fatalities increases.* This correlation is known to be inadequate. Magnitude is a poor proxy for shaking for a number of reasons, and fatalities are related to shaking damage, *not* magnitude. Depth, distance to the fault, population exposure at a given shaking intensity and vulnerability are known predictor variables in modern studies.

19. L101. *The relationship between the number of fatalities and the initial time is relatively vague.* Fatalities vs time of day *cannot simply be related* without considering the population exposure per intensity level at the time of the earthquake for each event. Nighttime events *should* be more deadly than during the daytime, but one event at night may be in an area of high population and one during the day in low; one needs to normalize for these other important variables.
20. L108. *Based on the aforementioned analysis, the magnitude, epicentral intensity and initial time were selected as the main parameters used to establish the basic earthquake emergency scenarios.* In the sentences above this, Time of Day was should to not be correlative. Why is it then used? Magnitude should not be used (as described in #18), and there are problems with epicentral intensity (described above). So, it is unlikely that these parameters provide a robust fatality estimate model.
21. L112. *The magnitude was divided into three levels ( $4.5 \leq M < 6$ ,  $6 \leq M < 7$  and  $7 \leq M \leq 8$  ( $M$  means magnitude)) according to the principle of magnitude 112 division in the earthquake emergency programming of China (The National Earthquake Emergency Plan, 2012).* The citation for these terms is “The national earthquake emergency plan” which is in Chinese. Moreover, not only is magnitude not a proper predictor variable, bins of M4.5 to M6.0 or M6 to M7 cover enormous ranges; binning them together is not justified or justifiable. (M6 fault is ~10-15 km in length; M7 is ~60 km in length). Likewise, would one expect shaking (and thus, fatalities, all other things being equal) from an M4.5 to be in the same category as shaking from an M6.0 event?
22. L115. *The relationship between magnitude ( $M$ ) and epicentral intensity ( $I_0$ ) is as follows :  $M = 0.58I_0 + 1.5$  (GB/T17742).* The Reference given is: “GB/T17742, The Chinese seismic intensity scale, 2008.” I don’t know what this source is, but the Chinese Seismic Intensity Scale has not been published, as far as this reviewer knows. The Reference is also in Chinese. I cannot examine either the scale or equation cited.
23. L132. The term “*basic earthquake emergency scenarios*” is a term not used as far as I know, and it’s not clear what exactly it refers to.
24. L139. *We needed a functional form describing the fatalities with the victim and mortality rate.* In addition to grammatical and typos, I cannot decipher this sentence.
25. L143. *seismic intensity elliptical attenuation model.* Elliptical attenuation needs justification; it is not used in any modern ground motion prediction equations.
26. L265. *The overall evaluation result of this estimation model was good.* This statement does not provide any information to the reader. What evaluation, with what statistics and what does “good” mean?
27. L277. *The interval estimation of the fatalities in the model can consider the extreme events with larger mortality rates but small probability.* Please rewrite. I don’t know what this means.
28. Table 5. I don’t understand this table. Please explain.
29. Table 6. First “victims” is not defined in the paper. Does this mean displaced? Injured? If either, data for displaced persons or injuries is so uncertain that it challenges credibly that the model can accurately predict them (100% as reported there). If is not believable that one can get an exact answer to an uncertain problem. Please define “victims” and explain how it is possible to calculate this number especially with such a simplified shaking model (elliptical shape)?
30. Table 7. Define “interval of fatalities”.
31. Conclusions. L291. *Based on the current study, the following aspects were mainly improved: 1. During the actual emergency process, the information on on-site earthquakes will be acquired as time progresses. Therefore, how to update the results with the updated information is in need of further study. 2. With the development of remote sensing and unmanned aerial vehicle (UAV) technology, images can be used after the earthquake for damage estimation.* These are not “conclusions” since these topics were not even discussed in the paper. Please clarify.

## Technical Corrections

1. There are numerous errors in the References, including, but not limited to:
  - a. Wald D J, Earle P S, Allen T I, et al. Development of the US Geological Survey's PAGER system is given a rather wrong journal title (*Journal of Automated Chemistry*)???
  - b. Jaiswal et al is cited incorrectly as “U.s. Geological Survey” (with no report series or journal).
  - c. GB/T17742, The Chinese seismic intensity scale, 2008.?
  - d. At least seven of the key References are in Chinese.
  - e. Larson R C, Eshghi K. is cited as Eshghi and Larson in the manuscript.

2. There is a large number of typos in the manuscript that any word processor should catch. I've not enumerated them but please use a spell-checker.

#### Review References Cited

Wald, D. J., K. Jaiswal, K. D. Marano, and D. Bausch (2010). An Earthquake Impact Scale, *Natural Hazards Review*, 12, 125-139, doi:10.1061/(ASCE)NH.1527-6996.0000040
